# Supplementary material for: Synthesis and stability of single-phase chalcopyrite – a potential reference material for key investigations in chemistry and metallurgical engineering
Source: Royal Society of Chemistry journal article supplement (doi:10.1039/d0ra09700d), 2021-01-01
Supplement: d0ra09700d1.pdf [file d0ra09700d1.pdf]

## Synthesis and stability of single-phase chalcopyrite – a potential reference material for key investigations in chemistry and metallurgical engineering

Ninett Frenzel, Marcel Mehne, Sebastian Bette, Sven Kureti and Gero Frisch

### Supporting information

Table S1: Results of Mößbauer spectroscopy for the compositions between 48 and 50.5 at% S in the reactant mixtures. Bornite and pyrite are given as references. Line width (WID), Isomer shift (ISO), quadrupole splitting (QUA) and hyperfine field (B) are reported relative to an  $\alpha$ -Fe reference at room temperature. Parameters are given with fit uncertainties (unc.). Numbers written in bold were fixed before fitting. Abbreviations: cpy = chalcopyrite, tal = talnakhite, py = pyrite, bo = bornite, isocub = isocubanite; sext = sextet, doub = doublet.

| at% S | sub-band | phase  | portion / at% | WID unc. / mm s <sup>-1</sup> | ISO unc. / mm s <sup>-1</sup> | QUA unc. / mm s <sup>-1</sup> | B unc. / T | X <sup>2</sup> Fit |
|-------|----------|--------|---------------|-------------------------------|-------------------------------|-------------------------------|------------|--------------------|
| 48.00 | sext1    | cpy    | 54.8          | 0.40 0.01                     | 0.27 0.01                     | -0.03 0.01                    | 34.7 0.1   | 2.3                |
|       | doub1    | bo     | 0.4           | <b>0.40</b> -                 | <b>0.47</b> -                 | <b>0.18</b> -                 | - -        |                    |
|       | doub2    | isocub | 6.7           | <b>0.60</b> -                 | <b>0.50</b> -                 | <b>0.90</b> -                 | - -        |                    |
|       | doub3    |        | <b>0.60</b> - | <b>0.50</b> -                 | <b>0.50</b> -                 | - -                           |            |                    |
|       | sext2    | tal    | 38.0          | <b>1.00</b> -                 | 0.43 0.04                     | -0.16 0.03                    | 28.5 0.1   |                    |
| 48.50 | sext1    | cpy    | 69.6          | 0.34 0.01                     | 0.26 0.01                     | 0.00 0.01                     | 35.1 0.1   | 5.7                |
|       | doub1    | bo     | 0.5           | <b>0.40</b> -                 | <b>0.47</b> -                 | <b>0.18</b> -                 | - -        |                    |
|       | doub2    | isocub | 5.9           | <b>0.60</b> -                 | <b>0.50</b> -                 | <b>0.90</b> -                 | - -        |                    |
|       | doub3    |        | <b>0.60</b> - | <b>0.50</b> -                 | <b>0.50</b> -                 | - -                           |            |                    |
|       | sext2    | tal    | 24.1          | <b>1.00</b> -                 | 0.43 0.02                     | -0.15 0.04                    | 28.8 0.1   |                    |
| 49.00 | sext1    | cpy    | 81.2          | 0.32 0.01                     | 0.26 0.01                     | 0.00 0.01                     | 35.3 0.1   | 2.8                |
|       | doub1    | bo     | 0.4           | <b>0.40</b> -                 | <b>0.47</b> -                 | <b>0.18</b> -                 | - -        |                    |
|       | doub2    | isocub | 3.5           | <b>0.60</b> -                 | <b>0.50</b> -                 | <b>0.90</b> -                 | - -        |                    |
|       | doub3    |        | <b>0.60</b> - | <b>0.50</b> -                 | <b>0.50</b> -                 | - -                           |            |                    |
|       | sext2    | tal    | 14.8          | <b>1.00</b> -                 | 0.42 0.03                     | -0.06 0.06                    | 30.0 0.2   |                    |
| 49.25 | sext1    | cpy    | 81.4          | 0.31 0.01                     | 0.25 0.01                     | 0.00 0.01                     | 35.2 0.1   | 2.6                |
|       | doub1    | bo     | 0.4           | <b>0.40</b> -                 | <b>0.47</b> -                 | <b>0.18</b> -                 | - -        |                    |
|       | doub2    | isocub | 4.2           | <b>0.60</b> -                 | <b>0.50</b> -                 | <b>0.90</b> -                 | - -        |                    |
|       | doub3    |        | <b>0.60</b> - | <b>0.50</b> -                 | <b>0.50</b> -                 | - -                           |            |                    |
|       | sext2    | tal    | 14.0          | <b>1.00</b> -                 | 0.28 0.03                     | 0.03 0.05                     | 32.5 0.4   |                    |
| 49.50 | sext1    | cpy    | 98.8          | 0.30 0.01                     | 0.25 0.01                     | 0.00 0.01                     | 35.7 0.1   | 1.4                |
| 49.62 | doub1    | bo     | 1.2           | <b>0.40</b> -                 | <b>0.47</b> -                 | <b>0.18</b> -                 | - -        |                    |
| 49.62 | sext1    | cpy    | 100           | 0.31 0.01                     | 0.25 0.01                     | 0.00 0.01                     | 35.5 0.1   | 1.2                |
| 49.76 | sext1    | cpy    | 100           | 0.29 0.01                     | 0.25 0.01                     | 0.00 0.01                     | 35.8 0.1   | 1.2                |
| 49.88 | sext1    | cpy    | 96.2          | 0.28 0.01                     | 0.25 0.01                     | 0.00 0.01                     | 35.7 0.1   | 1.0                |
|       | doub1    | py     | 3.4           | <b>0.40</b> -                 | <b>0.31</b> -                 | <b>0.61</b> -                 | - -        |                    |
|       | doub2    | bo     | 0.4           | <b>0.40</b> -                 | <b>0.47</b> -                 | <b>0.18</b> -                 | - -        |                    |
| 49.91 | sext1    | cpy    | 93.6          | 0.29 0.01                     | 0.25 0.01                     | 0.00 0.01                     | 35.8 0.1   | 1.0                |
|       | doub1    | py     | 6.2           | 0.35 0.07                     | 0.31 0.02                     | 0.60 0.05                     | - -        |                    |
|       | doub2    | bo     | 0.1           | <b>0.40</b> -                 | <b>0.47</b> -                 | <b>0.18</b> -                 | - -        |                    |

| at% S   | sub-band | phase | portion / at% | WID unc. / mm s <sup>-1</sup> | ISO unc. / mm s <sup>-1</sup> | QUA unc. / mm s <sup>-1</sup> | B unc. / T | X <sup>2</sup> Fit |
|---------|----------|-------|---------------|-------------------------------|-------------------------------|-------------------------------|------------|--------------------|
| 50.01   | sext1    | cpy   | 86.5          | 0.29 0.01                     | 0.25 0.01                     | 0.00 0.01                     | 35.8 0.1   | 1.1                |
|         | doub1    | py    | 13.2          | 0.44 0.03                     | 0.31 0.01                     | 0.61 0.02                     | - -        |                    |
|         | doub2    | bo    | 0.3           | <b>0.40</b> -                 | <b>0.47</b> -                 | <b>0.18</b> -                 | - -        |                    |
| 50.51   | sext1    | cpy   | 80.8          | 0.28 0.01                     | 0.25 0.01                     | 0.00 0.01                     | 35.7 0.1   | 1.2                |
|         | doub1    | py    | 17.8          | 0.35 0.02                     | 0.31 0.01                     | 0.61 0.01                     | - -        |                    |
|         | doub2    | bo    | 1.4           | <b>0.40</b> -                 | <b>0.47</b> -                 | <b>0.18</b> -                 | - -        |                    |
| bornite | doub     | bo    | 100           | 0.37 0.04                     | 0.47 0.01                     | 0.18 0.03                     | - -        | 1.1                |
| pyrite  | doub     | py    | 100           | 0.37 0.01                     | 0.31 0.01                     | 0.63 0.01                     | - -        | 2.2                |

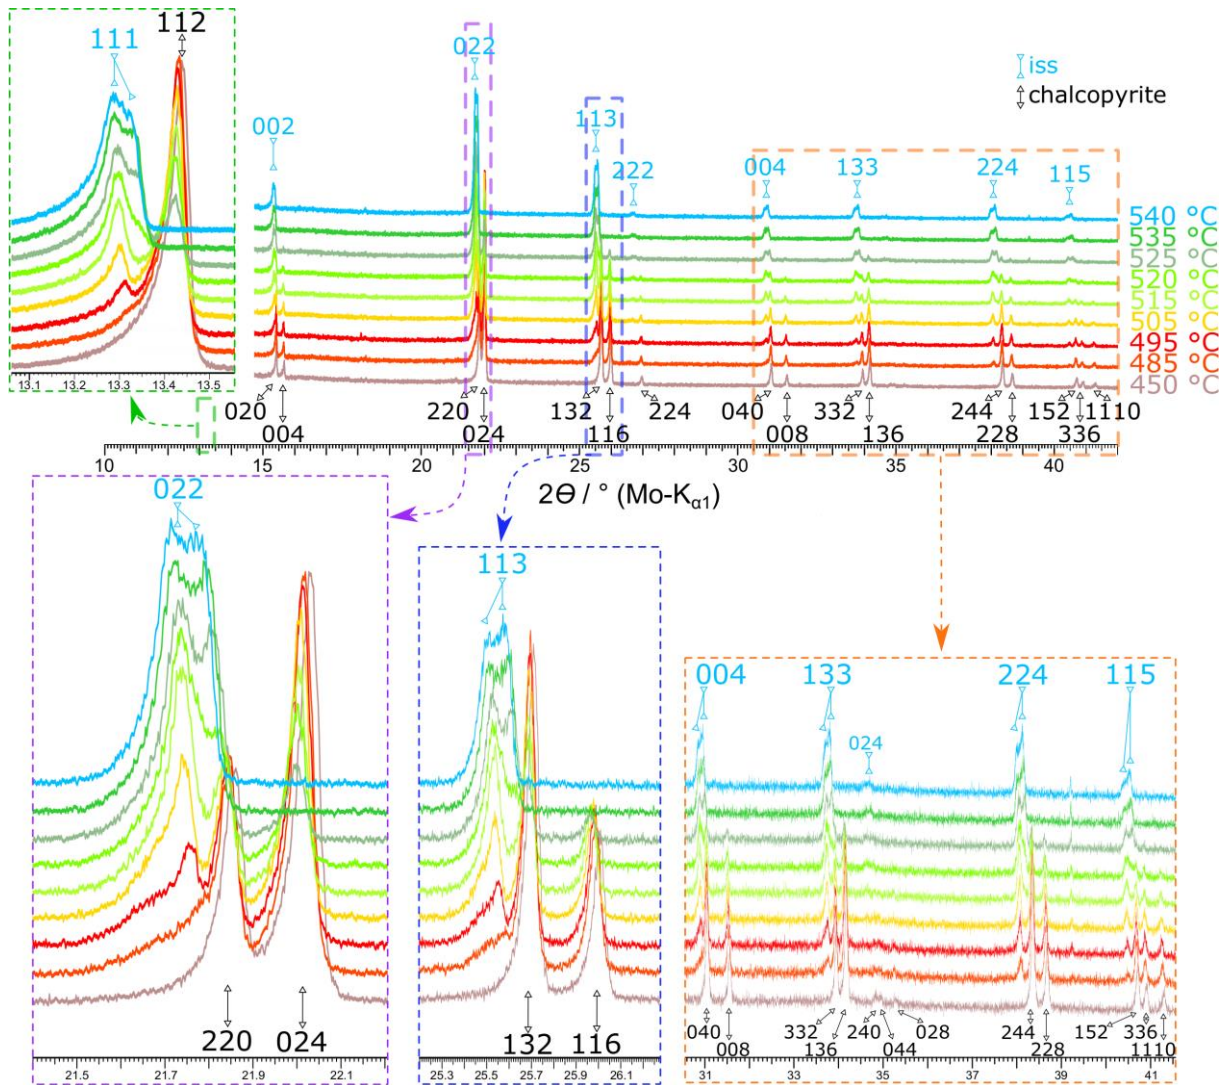

Figure S1: Detailed version of Figure 9: stacked XRPD pattern of the 49.76 at% S composition at different temperatures. Reflections for the tetragonal chalcopyrite cell are indexed black, the cubic high-temperature phase is indexed in light blue.

Crystallographic data for chalcopyrite's high temperature intermediate solid solution (obtained after heating the 49.50 at% S sample) are given in Table S2 and were submitted to the CCDC database under the deposition number 2033752.

Table S2: Crystallographic and Rietveld refinement data of chalcopyrite's high temperature intermediate solid solutions at 545 °C (samples synthesised at 450 °C with 49.50 at% S).

| substance name                            |       | copper iron sulfide                   |        |         |         |         |                       |
|-------------------------------------------|-------|---------------------------------------|--------|---------|---------|---------|-----------------------|
| sum formula                               |       | Cu <sub>0.5</sub> Fe <sub>0.5</sub> S |        |         |         |         |                       |
| molecular weight /<br>g mol <sup>-1</sup> |       | 91.76                                 |        |         |         |         |                       |
| temperature / °C                          |       | 545                                   |        |         |         |         |                       |
| space group                               |       | $F\bar{4}3m$ (216)                    |        |         |         |         |                       |
| Z                                         |       | 4                                     |        |         |         |         |                       |
| a / Å                                     |       | 5.3261(1)                             |        |         |         |         |                       |
| V / Å <sup>3</sup>                        |       | 151.089(3)                            |        |         |         |         |                       |
| $\rho_{\text{calc}} / \text{g cm}^{-3}$   |       | 4.03                                  |        |         |         |         |                       |
| wavelength / Å                            |       | 0.7093                                |        |         |         |         |                       |
| R-p / % *                                 |       | 5.91                                  |        |         |         |         |                       |
| R-wp / % *                                |       | 7.59                                  |        |         |         |         |                       |
| R-F <sup>2</sup> / % *                    |       | 4.56                                  |        |         |         |         |                       |
| R-exp / % *                               |       | 6.18                                  |        |         |         |         |                       |
| GOF *                                     |       | 1.23                                  |        |         |         |         |                       |
| starting angle / ° 2 $\theta$             |       | 10                                    |        |         |         |         |                       |
| final angle / ° 2 $\theta$                |       | 75                                    |        |         |         |         |                       |
| step width / ° 2 $\theta$                 |       | 0.003                                 |        |         |         |         |                       |
| time/scan / h                             |       | 12                                    |        |         |         |         |                       |
| no. of variables                          |       | 20                                    |        |         |         |         |                       |
| Atom                                      | Wyck. | Site                                  | S.O.F. | x/<br>a | y/<br>b | z/<br>c | B /<br>Å <sup>2</sup> |
| Cu(1)                                     | 4c    | -43m                                  | 0.5    | 1/4     | 1/4     | 1/4     | 3.4(1)                |
| Fe(1)                                     | 4c    | -43m                                  | 0.5    | 1/4     | 1/4     | 1/4     | 3.4(1)                |
| S(1)                                      | 4a    | -43m                                  | 1      | 0       | 0       | 0       | 3.4(1)                |

\* R-p, R-wp, R-F<sup>2</sup>, R-exp and GOF as defined in TOPAS (Bruker AXS)

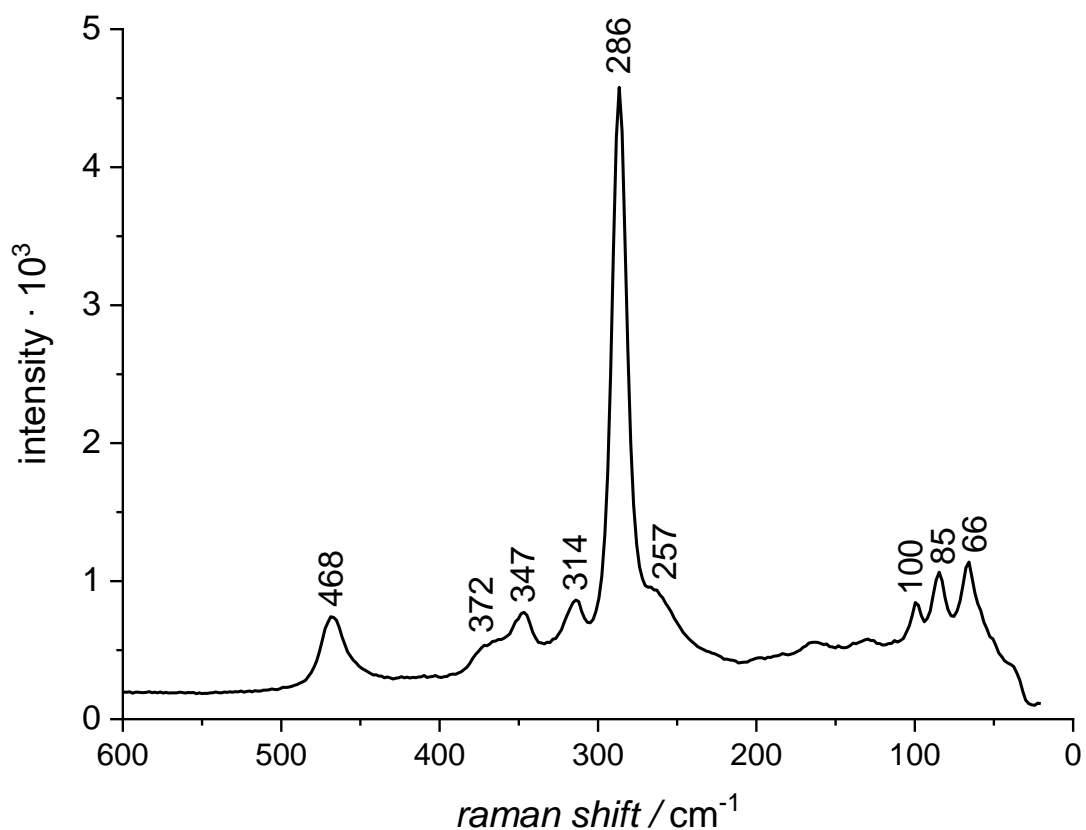

Figure S2: A typical Raman spectrum for single-phase chalcopyrite which is in good agreement with the literature.<sup>I-V</sup> Measurements were carried out using a HORIBA Scientific XploRA-PLUS Raman Microscope, with a laser operating at 532 nm using the LabSpec 6 - Horiba Scientific software. The displayed measurement was recorded with an 1800(450-850nm) grid and an object lens x100\_VIS\_LWD.

- I T. P. Mernagh and A. G. Trudu, *Chem. Geol.*, 1993, **103**, 113.
- II F. W. Ohrendorf and H. Haeuseler, *Cryst. Res. Technol.*, 1999, **34**, 339.
- III G. K. Parker, R. Woods and G. A. Hope, *Colloids Surf., A*, 2008, **318**, 160.
- IV S. N. White, *Chem. Geol.*, 2009, **259**, 240.
- V E. Dutková, Z. Bujňáková, J. Kováč, I. Škorvánek, M. J. Sayagués, A. Zorkovská and P. Baláž, *Adv. Powder Technol.*, 2018, **29**, 1820.
